# Supplementary material for: A Genetic and Structural Study of Genome Rearrangements Mediated by High Copy Repeat Ty1 Elements
Source: PLoS Genet. 2011 May 26;7(5):e1002089. doi: 10.1371/journal.pgen.1002089 (PMC3102749; doi:10.1371/journal.pgen.1002089)
Supplement: Table S1 — GCR rates compared to segmental duplication assay rates. (XLSX) [file pgen.1002089.s006.xlsx]

## Sheet: Sheet1
STable 1: GCR rates compared to segmental duplication assay rates
Grouping	Genotype	RDKY				Ratesa
		-Ty	+Ty912	Segmental Duplicationb		-Ty	+Ty912	Segmental Duplicationb
	wild type	6088/6089	6076/6077	6678		2.2 x 10-10 (1)	8.4 x 10-8 (1)	1.97 x 10-8 (1)
HR
	mre11D	6105/6106	6499/6500	6689		6.8 x 10-8 (309)	4.2 x 10-6 (50)	1.52 x 10-6 (77)
	rad52D	6619/6620	6503/6504	6708		5.1 x 10-9 (55)	1.3 x 10-8 (0.2)	1.09 x 10-8 (0.6)
	rad51D	6557/6558	6555/6556	6709		2 x 10-9 (9)	5.9 x 10-7 (7)	2.31 x 10-8 (1)
	rad59D	6597/6598	6599/6600	6710		1.6 x 10-9 (7)	6.1 x 10-8 (0.7)	6.94 x 10-8 (4)
	srs2D	5557c	6539/6540	6758		2.2 x 10-10 (1)c	9.6 x 10-7 (11)	1.28 x 10-7 (6)
	sgs1D	6107/6108	6501/6502	6690		2.1 x 10-9 (10)	3.1 x 10-6 (37)	1.93 x 10-6 (98)
	rad51D rad59D	7081/7082	7083/7084	6711		1.5 x 10-9 (8)	7.9 x 10-8 (0.9)	4.48 x 10-9 (0.2)
	rad52D rad51D	7185/7186	7187/7188			4.5 x 10-9 (20)	1.9 x 10-8 (0.2)
	rad52D rad59D	7189/7190	7191/7192			7.9 x 10-9 (36)	6.9 x 10-9 (0.1)
	rad52D rad51D rad59D	7087/7088	7085/7086	6712		4.9 x 10-9 (22)	1.7 x 10-8 (0.2)	4.53 x 10-9 (0.2)
Replication
	rfa1-t33	7042	7043/7072			4.5 x 10-9 (25)	3.5 x 10-7 (4)
	rrm3/rtt104D	5556c	6527/6528			1.4 x 10-9 (6)c	1.9 x 10-7 (2)
	mms1D	6189/6190	6535/6536			1.1 x 10-9 (5)	9.3 x 10-7 (11)
	rad27D	6543/6544	6545/6546	6688		5.8 x 10-7 (2636)	1.4 x 10-5 (166)	2.78 x 10-6 (141)
	cdc9-1	7039	7040/7041			3.3 x 10-7 (1500)	2.5 x 10-5 (298)
Checkpoint
	elg1/rtt110D	6151/6152	6509/6510			7.1 x 10-9 (32)	1.1 x 10-6 (13)
	rtt107/esc4D	6167/6168	6525/6526	6745		<5.3 x 10-10 (<2)	6.1 x 10-7 (7)	3.07 x 10-7 (16)
	sml1D	6589/6590	7073/7074			<4.6 x 10-10 (<2)	9.2 x 10-8 (1)
	mec1D sml1D	6583/6584	6581/6582	6769		2.1 x 10-8 (95)	1.1 x 10-6 (13)	1.50 x 10-7 (8)
	rad53D sml1D	6585/6586	6587/6588	6771		1 x 10-8 (45)	1.3 x 10-6 (12)	3.05 x 10-7 (15)
	dun1D	3739d	6515/6516	6772		7.3 x 10-8 (155)d	5.9 x 10-7 (7)	1.61 x 10-7 (8)
	chk1D	3745e	6623/6624	6773		1.3 x 10-8 (59)e	2.7 x 10-7 (3)	1.96 x 10-7 (10)
	tel1D	6569/6570	6571/6572	6770		<5 x 10-10 (<2)	1.4 x 10-7 (2)	2.87 x 10-8 (1)
	rad9D	3719e	6625/6626	6774		2 x 10-9 (9)e	8.8 x 10-8 (1)	3.82 x 10-8 (2)
	mrc1D	6175/6176	6529/6530	6747		<7.4 x 10-10 (<3)	1.2 x 10-6 (14)	3.75 x 10-7 (19)
	csm3D	6149/6150	6517/6518			<6.8 x 10-10 (<3)	3.6 x 10-7 (4)
	sic1D	6551/6552	6553/6554			2.1 x 10-8 (95)	5.2 x 10-6 (62)
Ty-related
	rtt105D	6191/6192	6537/6538			3 x 10-8 (136)	4.4 x 10-6 (52)
	pmr1D	7017/7018	7019/7020			<3.4 x 10-10 (<2)	1.5 x 10-8 (0.2)
MMR
	mlh1D	6603/6604	6601/6602	6716		<6.7 x 10-10 (<3)	1.5 x 10-7 (2)	3.85 x 10-8 (2)
	msh2D	6605/6606	6607/6608	6713		5.3 x 10-10 (2)	2.2 x 10-7 (3)	1.75 x 10-7 (9)
PRR
	rad6D	6143/6144	6507/6508	6750		1.2 x 10-9 (6)	3 x 10-6 (36)	6.03 x 10-7 (31)
	rad5D	5519f	6523/6524			1.6 x 10-9 (7)f	8.3 x 10-7 (10)
Chromatin
	rlf2/cac1D	4753g	7183/7184			1.2 x 10-7 (545)g	1.8 x 10-7 (2)
	rtt109D	6792/6793	6513/6514	6753		<4.8 x 10-10 (<2)	2.3 x 10-6 (27)	1.84 x 10-7 (9)
	rtt101D	6117/6118	6505/6506			1.6 x 10-9 (7)	8 x 10-7 (10)
	asf1D	6621/6622	6519/6520	6742		5.3 x 10-9 (24)	1.6 x 10-6 (19)	2.89 x 10-7 (15)
	spt21D	6549/6550	6547/6548			5.4 x 10-8 (245)	1.1 x 10-6 (13)
	rtt106D	6159/6160	6521/6522			1.4 x 10-9 (6)	1.6 x 10-7 (2)
	rtt102D	6123/6124	6511/6512			<5.2 x 10-10 (<2)	1 x 10-7 (1)
	sir4D	7177/7178	7179/7180			<4.8 x 10-10 (<2)	9.8 x 10-8 (1)
Transcription
	gal11D	6577/6588	6579/6580			<3.6 x 10-10 (<2)	1.3 x 10-8 (0.2)
	rtt103D	6181/6182	6531/6532			<5.5 x 10-10 (<3)	2 x 10-8 (0.2)
	spt8D	6575/6576	6573/6574			<5.1 x 10-10 (<2)	5.4 x 10-8 (0.6)
	spt2D	6559/6560	6561/6562			<3.2 x 10-10 (<1)	2.7 x 10-8 (0.3)
	spt4D	6567/6568	6565/6566			<4.6 x 10-10 (<2)	4.4 x 10-8 (0.5)
Oxidative Damage
	tsa1D	6611/6612	6609/6610			3.9 x 10-9 (18)	3.5 x 10-6 (42)
Telomere Synthesis
	est2D	4347d	6533/6534			1.2 x 10-10 (0.5)d	4.5 x 10-8 (0.5)
a Folds were calculated with respect to each assay's wild type rate; absolute rates for certain strains were taken from previous publications as indicated, but folds were calculated to the wild type rates measured in this study.
b Data reprinted from Putnam CD, Hayes TK, Kolodner RD (2009) Specific pathways prevent duplication-mediated genome rearrangements. Nature 460: 984-989.
c Data reprinted from Schmidt KH, Kolodner RD (2006) Suppression of spontaneous genome rearrangements in yeast DNA helicase mutants. Proc Natl Acad Sci U S A 103: 18196-18201.
d Data reprinted from Myung K, Chen C, Kolodner RD (2001) Multiple pathways cooperate in the suppression of genome instability in Saccharomyces cerevisiae. Nature 411: 1073-1076.
e Data reprinted from Myung K, Datta A, Kolodner RD (2001) Suppression of spontaneous chromosomal rearrangements by S phase checkpoint functions in Saccharomyces cerevisiae. Cell 104: 397-408.
f Data reprinted from Kats ES, Enserink JM, Martinez S, Kolodner RD (2009) The Saccharomyces cerevisiae Rad6 postreplication repair and Siz1/Srs2 homologous recombination-inhibiting pathways process DNA damage that arises in asf1 mutants. Mol Cell Biol 29: 5226-5237.
g Data reprinted from Myung K, Pennaneach V, Kats ES, Kolodner RD (2003) Saccharomyces cerevisiae chromatin-assembly factors that act during DNA replication function in the maintenance of genome stability. Proc Natl Acad Sci U S A 100: 6640-6645.
