# Supplementary material for: A Genetic and Structural Study of Genome Rearrangements Mediated by High Copy Repeat Ty1 Elements
Source: PLoS Genet. 2011 May 26;7(5):e1002089. doi: 10.1371/journal.pgen.1002089 (PMC3102749; doi:10.1371/journal.pgen.1002089)
Supplement: Table S2 — Summary of aCGH data. (XLS) [file pgen.1002089.s007.xls]

## Sheet: Sheet1
STable 2: Summary of aCGH data
Isolate #	Genotype	GCR Assay	RDKY	Eventa	Additional Eventsa	Suspected Genomic Rearrangement Locusb	Monocentric Direct/Invertedc	Class
1	wild type	-Ty	6088	del(5)(34684->TEL05R)			-	I
2	wild type	-Ty	6088	del(5)(34684->TEL05R)			-	I
3	wild type	-Ty	6088	del(5)(34684->TEL05R)			-	I
4	wild type	-Ty	6088	del(5)(31784->TEL05R)			-	I
5	wild type	-Ty	6088	del(5)(34824->TEL05R)			-	I
6	wild type	-Ty	6088	del(5)(33704->TEL05R)			-	I
7	wild type	-Ty	6088	del(5)(33554->TEL05R)			-	I
8	wild type	+Ty912	6076	der(5)t(5;10)(36264;484396)		Ty912::YJRWTy1-2	D	II
9	wild type	+Ty912	6076	der(5)t(5;13)(36264;183747)		Ty912::YMLWTy1-1	I	III
10	wild type	+Ty912	6076	der(5)t(5;3)(36264;169203)		Ty912::Unannotated delta next to YCRWdelta10	D	II
11	wild type	+Ty912	6076	der(5)t(5;12)(36264;651119)		Ty912::YLRWTy1-3	D	II
12	wild type	+Ty912	6076	der(5)t(5;13;13)(TEL05R->36264::190237->196159::196159->TEL15L)		Ty912::YMLWTy1-1->YMLWTy1-2::YMLWTy1-2	I	III
13	wild type	+Ty912	6076	der(5)t(5;3)(36264;151789)		Ty912::Unannotated Ty at YCRWdelta10	D	II
14	wild type	+Ty912	6076	der(5)t(5;5)(36264;431958)		Ty912::YERCdelta14	I	III
15	wild type	+Ty912	6076	der(5)t(5;5)(36264;449288)		Ty912::YERWdelta17	D	II
16	wild type	+Ty912	6076	der(5)t(5;3)(36264;151419)		Ty912::YCRWdelta10	D	II
17	wild type	+Ty912	6076	der(5)t(5;10)(36264;484256)		Ty912::YJRWTy1-1	D	II
18d	mre11	+Ty912	6499	der(5)t(5;12)(36264;481871),der(5)t(5;14)(36264;96578)		Ty912::YLRCTy1-1,Ty912::YNLCTy1-1	I,D	III,II
19	mre11	+Ty912	6499	der(5)t(5;4)(36264;1213245)		Ty912::YDRWTy1-5	D	II
20	mre11	+Ty912	6499	der(5)t(5;3)(36264;151949)		Ty912::YCRWdelta10	D	II
21	mre11	+Ty912	6499	der(5)t(5;12)(36264;657809)		Ty912::YLRWTy1-3	D	II
22	mre11	+Ty912	6499	der(5)t(5;14)(36264;96578)		Ty912::YNLCTy1-1	D	II
23	mre11	+Ty912	6499	der(5)t(5;12)(36264;599039)		Ty912::(YLRCdelta9 or YLRWTy1-2 or YLRCdelta12)	?	IV
24	mre11	+Ty912	6499	der(5)t(5;12)(36264;658129)		Ty912::YLRWdelta15	D	II
25	rtt105	+Ty912	6537	der(5)t(5;14)(36264;96298)		Ty912::YNLCTy1-1	D	II
26	rtt105	+Ty912	6537	der(5)t(5;5)(36264;449768)		Ty912::YERWdelta21	D	II
27	rtt105	+Ty912	6537	der(5)t(5;12)(36264;657649)		Ty912::YLRWTy1-3	D	II
28	rtt105	+Ty912	6537	der(5)t(5;5)(36264;449608)		Ty912::YERWdelta21	D	II
29	rtt105	+Ty912	6537	der(5)t(5;10)(36264;484076)		Ty912::(YJRWTy1-1 or YJRWTy1-2)	D	II
30	rtt105	+Ty912	6537	der(5)t(5;5)(36264;449608)		Ty912::YERWdelta21	D	II
31	rtt105	+Ty912	6537	der(5)t(5;12)(36264;818810)	del(16)(TEL16L->777191::781801->TEL16R)	Ty912::YLRCdelta21	I	III
32	mrc1	+Ty912	6529	der(5)t(5;4)(36264;1214025)		Ty912::YDRWTy1-5	D	II
33	mrc1	+Ty912	6529	der(5)t(5;4)(36264;1212585)		Ty912::YDRWTy1-5	D	II
34	mrc1	+Ty912	6529	der(5)t(5;4)(36264;1101653)		Ty912::YDRWTy1-4	D	II
35	mrc1	+Ty912	6529	der(5)t(5;5)(36264;449608)		Ty912::YERWdelta21	D	II
36	mrc1	+Ty912	6529	der(5)t(5;7)(36264;541966)		Ty912::(YGRWdelta11 or YGRCdelta12 or YGRWTy1-1)	?	IV
37	mrc1	+Ty912	6529	der(5)t(5;10)(36264;483936)		Ty912::(YJRWTy1-1 or YJRWTy1-2)	D	II
38	mrc1	+Ty912	6529	der(5)t(5;4)(36264;1213405)		Ty912::YDRWTy1-5	D	II
39	srs2	+Ty912	6539	der(5)t(5;3)(36264;169509)		Ty912::YCRWdelta11	D	II
40	srs2	+Ty912	6539	der(5)t(5;12)(36264;821230)		Ty912::YLRCdelta21	I	III
41	srs2	+Ty912	6539	der(5)t(5;10)(36264;484076)		Ty912::(YJRWTy1-1 or YJRWTy1-2)	D	II
42	srs2	+Ty912	6539	der(5)t(5;3)(36264;169649)		Ty912::YCRWdelta11	D	II
43	srs2	+Ty912	6539	der(5)t(5;4)(36264;1214025)		Ty912::YDRWTy1-5	D	II
44	srs2	+Ty912	6539	der(5)t(5;10)(36264;484256)		Ty912::(YJRWTy1-1 or YJRWTy1-2)	D	II
45	srs2	+Ty912	6539	der(5)t(5;16)(36264;856872)		Ty912::(YPRWTy1-3 or YPRCdelta22 or YPRCTy1-4)	?	IV
46	mec1 sml1	+Ty912	6581	der(5)t(5;12;16)(TEL05R->36264::?(599339<->976200)::857192->TEL16R)		Ty912::?((YLRCdelta9 or YLRWTy1-2 or YLRWdelta12)<->YLRCTy2-2)::(YPRWTy1-3 or YPRCdelta22 or YPRCTy1-4)	?	V
47	mec1 sml1	+Ty912	6581	der(5)t(5;4;4)(TEL05R->36264::806417->980797::1353255->TEL04R)		Ty912::(YDRWdelta11 or YDR170W-A)->(YDRWTy2-3 or YDRCTy1-3)::(YDRWdelta29 or YDRWdelta30)	?	V
48	mec1 sml1	+Ty912	6581	der(5)t(5;7)(36264;542286)		Ty912::(YGRWdelta11 or YGRCdelta12 or YGRWTy1-1)	?	IV
49	mec1 sml1	+Ty912	6581	der(5)t(5;10)(36264;484076)		Ty912::(YJRWTy1-1 or YJRWTy1-2)	D	II
50	mec1 sml1	+Ty912	6581	der(5)t(5;15)(36264;117547)		Ty912::YOLWTy1-1	I	III
51	mec1 sml1	+Ty912	6581	der(5)t(5;16)(36264;810821)		Ty912::(YPRWdelta17 or YPRCTy1-2)	?	IV
52	mec1 sml1	+Ty912	6581	der(5)t(5;3)(36264;82368)		Ty912::(YCLCdelta1 or YCLWdelta15)	?	IV
53	rtt109	+Ty912	6513	der(5)t(5;4)(36264;805767)	+8	Ty912::(YDRWdelta11 or YDR170W-A)	D	II
54	rtt109	+Ty912	6513	der(5)t(5;4;10)(TEL05R->36264::1101813->1206515::483936->TEL10R)		Ty912::YDRWTy1-4::YDRWTy1-5::(YJRWTy1-1 or YJRWTy1-2)	?	V
55	rtt109	+Ty912	6513	der(5)t(5;4)(36264;96578)	+3,+8	Ty912::YNLCTy1-1	D	II
56	rtt109	+Ty912	6513	der(5)t(5;10)(36264;484876)	+8	Ty912::(YJRWTy1-1 or YJRWTy1-2)	D	II
57	rtt109	+Ty912	6513	der(5)t(5;10)(36264;484076)		Ty912::(YJRWTy1-1 or YJRWTy1-2)	D	II
58	rtt109	+Ty912	6513	der(5)t(5;8)(36264;85265)	+dup(5)(36264->TEL05R)	Ty912::(YHLCdelta1 or YHLWdelta2)	?	IV
59	rtt109	+Ty912	6513	der(5)t(5;3)(36264;169509)		Ty912::YCRWdelta11	D	II
60	spt21	+Ty912	6547	der(5)t(5;14)(36264;96298)		Ty912::YNLCTy1-1	D	II
61	spt21	+Ty912	6547	der(5)t(5;13)(36264;151789)		Ty912::YCRWdelta10	D	II
62	spt21	+Ty912	6547	der(5)t(5;12)(36264;818640)		Ty912::YLRCdelta21	I	III
63	spt21	+Ty912	6547	der(5)t(5;12)(36264;818960)		Ty912::YLRCdelta21	I	III
64	spt21	+Ty912	6547	der(5)t(5;12)(36264;818640)		Ty912::YLRCdelta21	I	III
65	spt21	+Ty912	6547	der(5)t(5;12)(36264;599189)		Ty912::(YLRCdelta9 or YLRWTy1-2 or YLRWdelta12)	?	IV
66	spt21	+Ty912	6547	der(5)t(5;10;16)(TEL05R->36264::484076->584736::916073->TEL16R)		Ty912::(YJRWTy1-1 or YJRWTy1-2)->CSN12::SKI3	?	V
67	rad53 sml1	+Ty912	6587	der(5)t(5;16)(36264;856522)	+12	Ty912::(YPRWTy1-3 or YPRCdelta22 or YPRCTy1-4)	?	IV
68	rad53 sml1	+Ty912	6587	der(5)t(5;16)(36264;850322)		Ty912::(YPRWTy1-3 or YPRCdelta22 or YPRCTy1-4)	?	IV
69	rad53 sml1	+Ty912	6587	der(5)t(5;4)(36264;1101813)		Ty912::YDRWTy1-4	D	II
70	rad53 sml1	+Ty912	6587	der(5)t(5;16)(36264;850322)		Ty912::(YPRWTy1-3 or YPRCdelta22 or YPRCTy1-4)	?	IV
71	rad53 sml1	+Ty912	6587	del(5)(36264->TEL05R)	trp(5)(40124<->44764);dup(44904<->60428)		-	I
72	rad53 sml1	+Ty912	6588	der(5)t(5;3)(36264;169509)		Ty912::YCRWdelta11	D	II
73	rad53 sml1	+Ty912	6588	del(5)(36264->TEL05R)	trp(5)(65518<->68538)		-	I
74	rtt103	+Ty912	6531	der(5)t(5;14)(36264;96298)		Ty912::YNLCTy1-1	D	II
75	rtt103	+Ty912	6531	der(5)t(5;10)(36264;483936)		Ty912::(YJRWTy1-1 or YJRWTy1-2)	D	II
76	rtt103	+Ty912	6531	der(5)t(5;12)(36264;599189)		Ty912::(YLRCdelta9 or YLRWTy1-2 or YLRWdelta12)	?	IV
77	rtt103	+Ty912	6531	der(5)t(5;3)(36264;169509)		Ty912::YCRWdelta11	D	II
78	rtt103	+Ty912	6531	der(5)t(5;12)(36264;657989)		Ty912::YLRWTy1-3	D	II
79	rtt103	+Ty912	6531	del(5)(36264->TEL05R)			-	I
80	rtt103	+Ty912	6531	del(5)(36264->TEL05R)			-	I
81	asf1	+Ty912	6519	der(5)t(5;3)(36264;169969)		Ty912::YCRWdelta11	D	II
82	asf1	+Ty912	6519	der(5)t(5;14)(36264;96298)		Ty912::YNLCTy1-1	D	II
83	asf1	+Ty912	6519	der(5)t(5;16)(36264;856522)		Ty912::(YPRWTy1-3 or YPRCdelta22 or YPRCTy1-4)	?	IV
84	asf1	+Ty912	6519	der(5)t(5;10)(36264;197898)		Ty912::YJLCdelta3	D	II
85	asf1	+Ty912	6519	der(5)t(5;10)(36264;483936)		Ty912::(YJRWTy1-1 or YJRWTy1-2)	D	II
86	asf1	+Ty912	6519	der(5)t(5;14)(36264;100998)		Ty912::YNLCTy1-1	D	II
87	asf1	+Ty912	6519	der(5)t(5;10)(36264;483936)		Ty912::(YJRWTy1-1 or YJRWTy1-2)	D	II
88	rad27	+Ty912	6545	der(5)t(5;12)(36264;818640)		Ty912::YLRCdelta21	I	III
89	rad27	+Ty912	6545	der(5)t(5;10)(36264;484396)		Ty912::(YJRWTy1-1 or YJRWTy1-2)	D	II
90	rad27	+Ty912	6545	der(5)t(5;2)(36264;33171)		Ty912::(YBLWTy2-1 or YBLWdelta6)	I	III
91	rad27	+Ty912	6545	der(5)t(5;14)(36264;96138)		Ty912::YNLCTy1-1	D	II
92	rad27	+Ty912	6545	del(5)(36264->TEL05R)			-	I
93	rad27	+Ty912	6545	der(5)t(5;10)(36264;484396)		Ty912::(YJRWTy1-1 or YJRWTy1-2)	D	II
94	rad27	+Ty912	6545	der(5)t(5;5)(36264;449768)		Ty912::(YERWdelta17 or YERCTy1-1)	?	IV
a Event descriptions are adaptations from human cytogenetics rules ISCN 1995. See (2001). "ISCN rules for listing chromosomal rearrangements." Curr Protoc Hum Genet Appendix 4: Appendix 4C.
b Suspected rearrangement loci are those found at the borders of the deleted, duplicated, or triplicated regions believed to be involved in the Ty912-mediated rearrangement. In certain cases, multiple, closely spaced Tys were found and the involved Ty could not be specifically identiied; thus, all putative Tys are listed within parantheses.
c Indicates the orientation of the Ty thought to be fused to chromosome V at Ty912 based on the aCGH data alone. D: direct telomere oriented Ty (class I); I: indirect centromere oriented Ty (class II); ?: ambiguous Ty due to the presence of multiple Tys (classes IV and V); -: not applicable because of de novo telomere (class I)
d Mixed isolate containing two independent events
